# Supplementary material
Source: publisher figshare collection journal article supplement (https://frontiersin.figshare.com/ndownloader/files/31321798)
Supplement: Supplementary file [file 31321798]

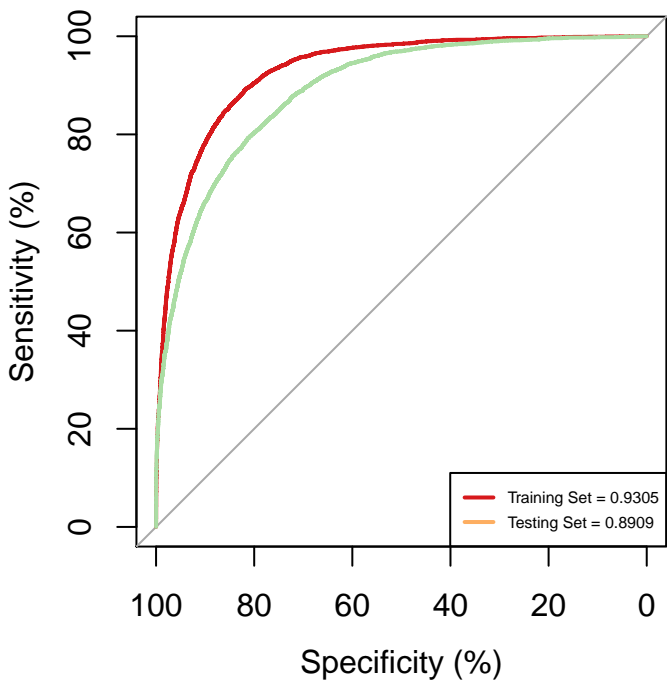

Fig. S1. The ROC curves of the training dataset and testing dataset.
